# Supplementary material
Source: PubMed Central journal article supplement (PMC4153706)
Supplement: JCI76069sd.pdf [file JCI76069sd.pdf]

## ONLINE DATA SUPPLEMENTS

Santulli G. et al. “A microRNA-based strategy to suppress restenosis while preserving endothelial function”

## Supplementary Figures

Figure S1

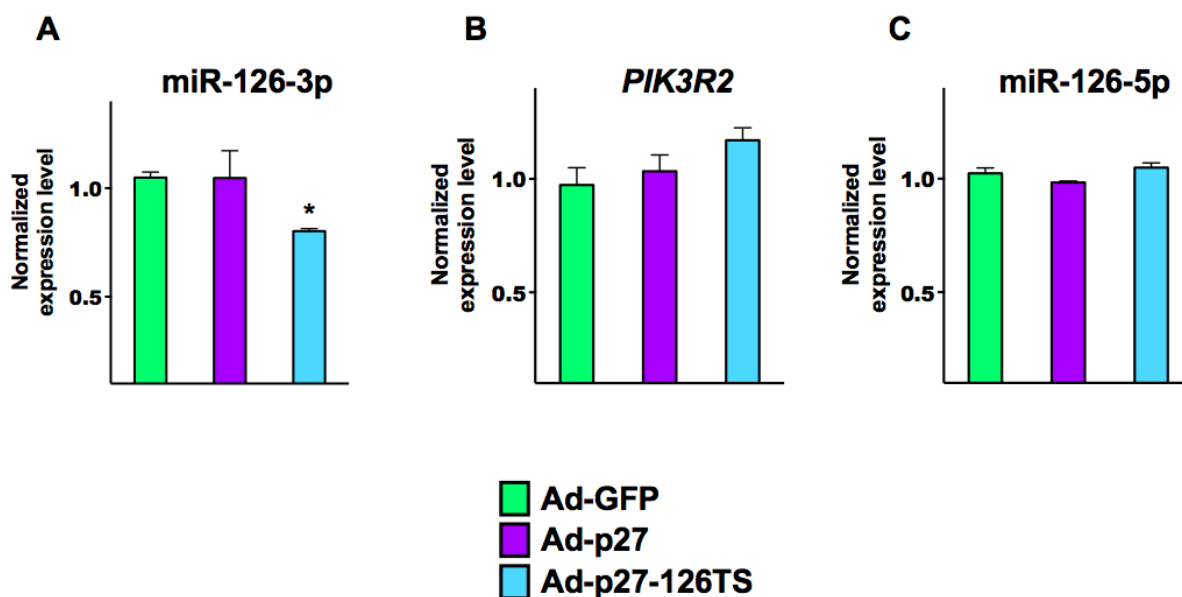

**Effect of Ad-p27-126TS on the expression of miR-126-3p, *PIK3R2* and miR-126-5p in vitro.**

EC were infected with the indicated adenoviruses for 24 h. Total RNA was extracted, and real time RT-qPCR for 126-3p (A), *PIK3R2* (B), and miR-126-5p (C) was performed. Expression levels of miRNAs were normalized to U18, *PIK3R2* was normalized to *GAPDH*. Data shown are means $\pm$ SE; \* $p$ <0.05 vs Ad-GFP, one-way ANOVA, Tukey-Kramer *post hoc* test.

Figure S2

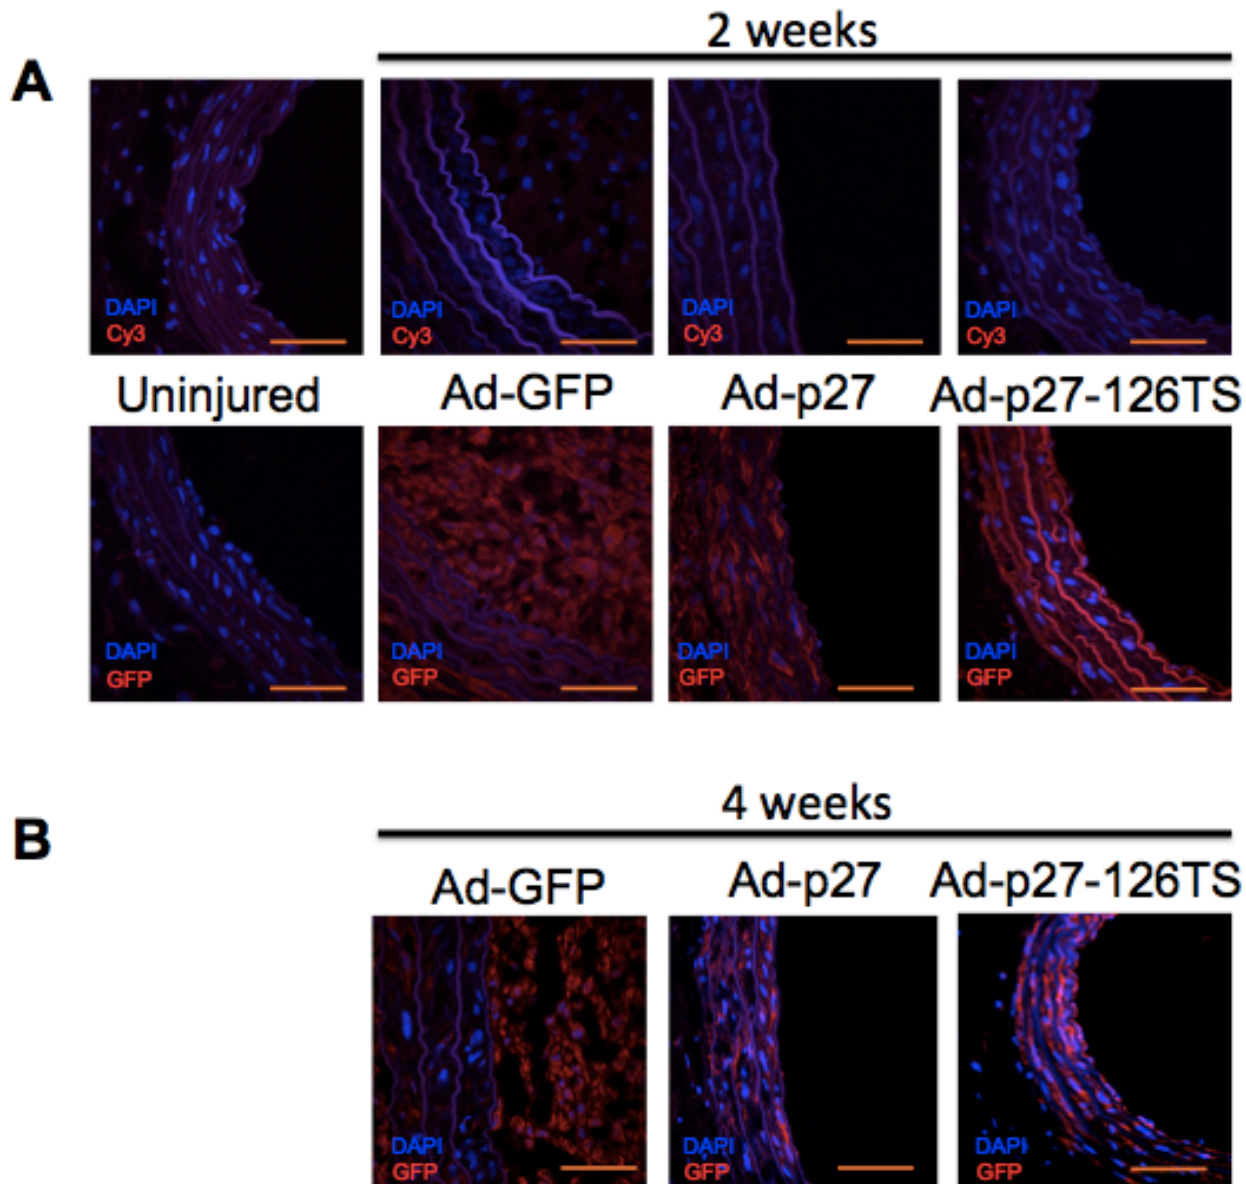

**Efficiency of Ad infection two and four weeks after surgery.**

The efficiency of Ad infection was evaluated 2 (**A**) and 4 weeks after surgery (**B**) using a primary antibody against GFP detected using a Cy3-coniugated secondary antibody. Representative digital images are shown. In A, top: negative control (secondary antibody alone, Cy3); bottom: staining for GFP revealed by Cy3. Scale bar represents 100  $\mu$ m (magnification 60 $\times$ ).

Figure S3

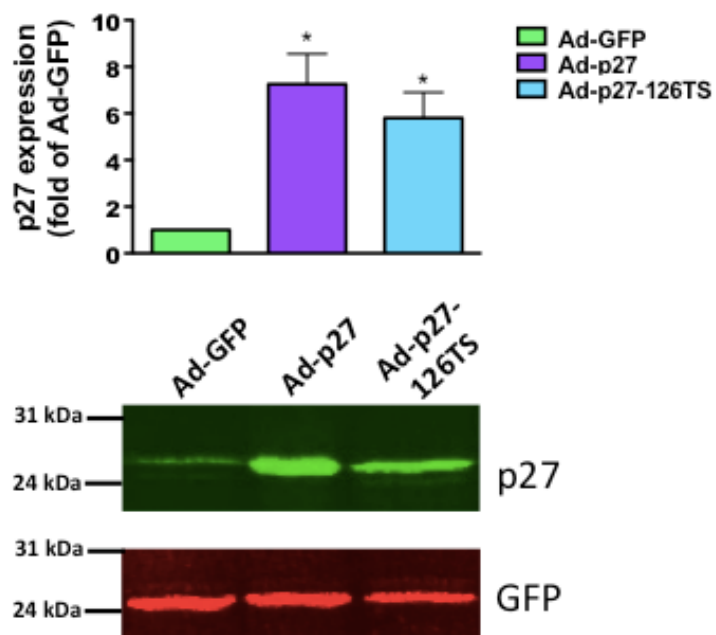

### Assessment of p27 overexpression in the carotid wall three days after surgery.

Three days after infection with the indicated Ad constructs the vessels were homogenized and samples were size-fractionated by SDS-PAGE; proteins were transferred to polyvinylidene difluoride membrane and visualized by immunoblotting using infrared-labeled antibodies. Data shown in the graph represents means $\pm$ SE; \* $p < 0.05$  vs Ad-GFP, one-way ANOVA, Tukey-Kramer *post hoc* test.

Figure S4

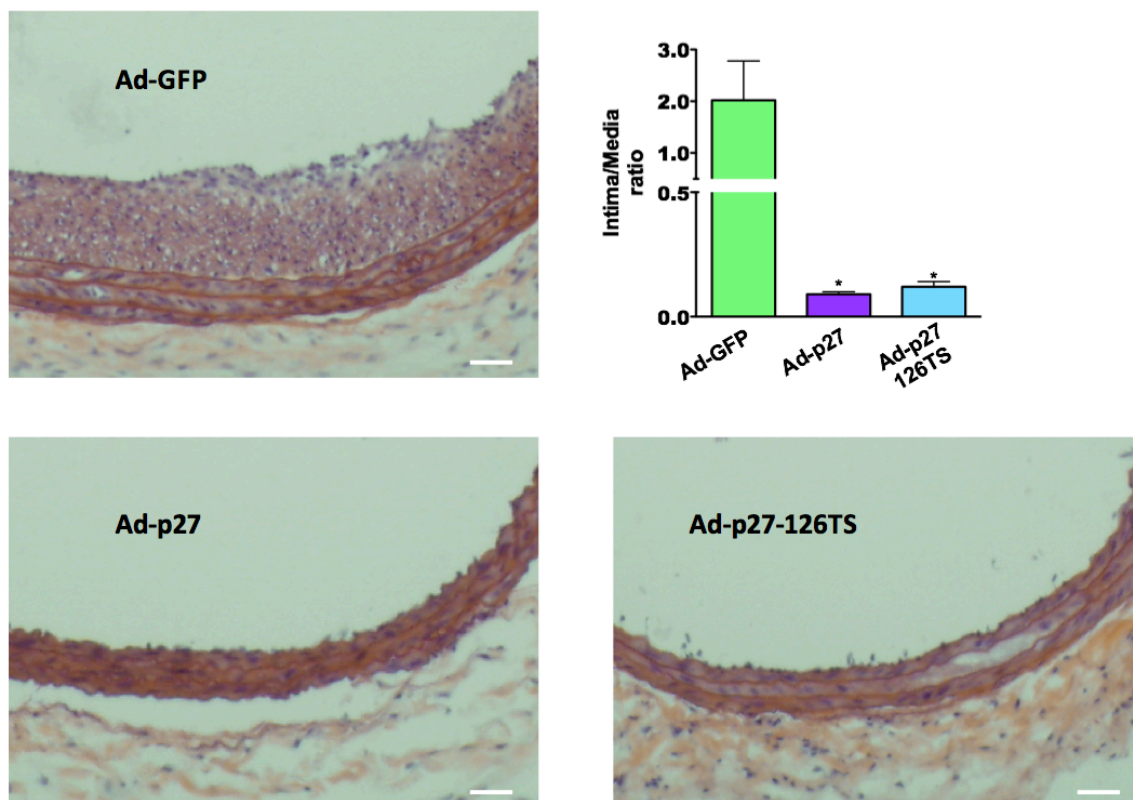**Ad-p27 and Ad-p27-126TS inhibit restenosis 4 weeks after balloon injury.**

Representative sections stained with hematoxylin / eosin (magnification 40×; dimensional bar represents 100 μm). Intima/media ratios were calculated from at least 6 rats/group. All data shown are means ± SEM. Data comparisons were made using one way ANOVA followed by Tukey-Kramer *post hoc* test; \* $P < 0.01$  versus Ad-GFP.

Figure S5

**A**

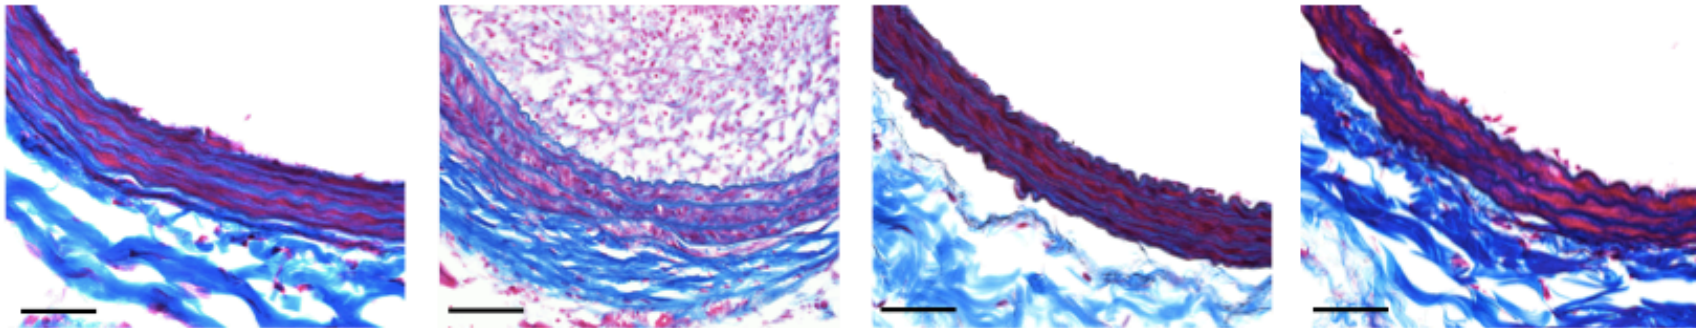

**Uninjured**

**Ad-GFP**

**Ad-p27**

**Ad-p27-126TS**

**B**

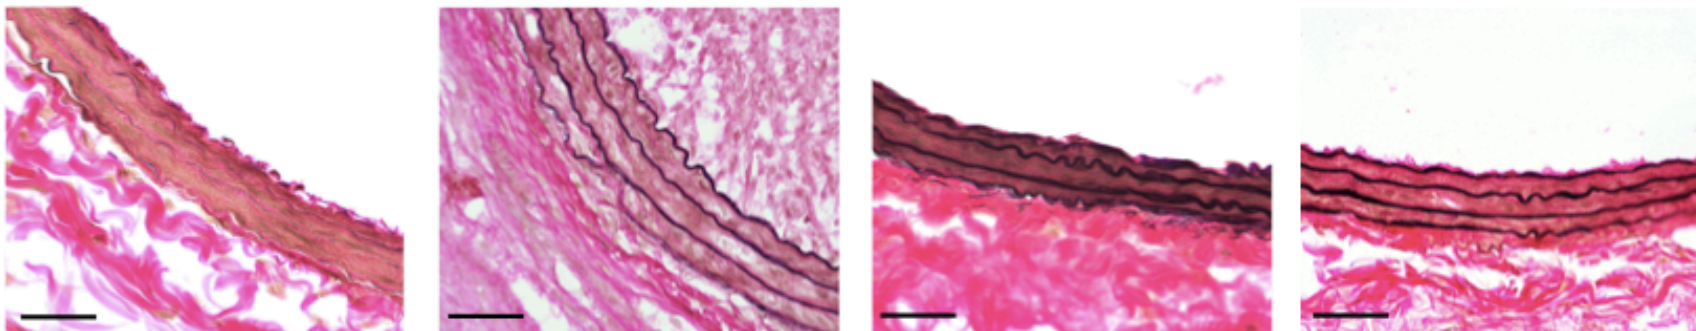

**Ad-p27 and Ad-p27-126TS restored the arterial structure to the uninjured control vessel.**

Representative sections stained with **(A)** Masson's Trichrome to detect collagen fibers or **(B)** Verhoeff Van Gieson to detect elastin fibers (magnification 40×; dimensional bar represents 100 μm).

Figure S6.

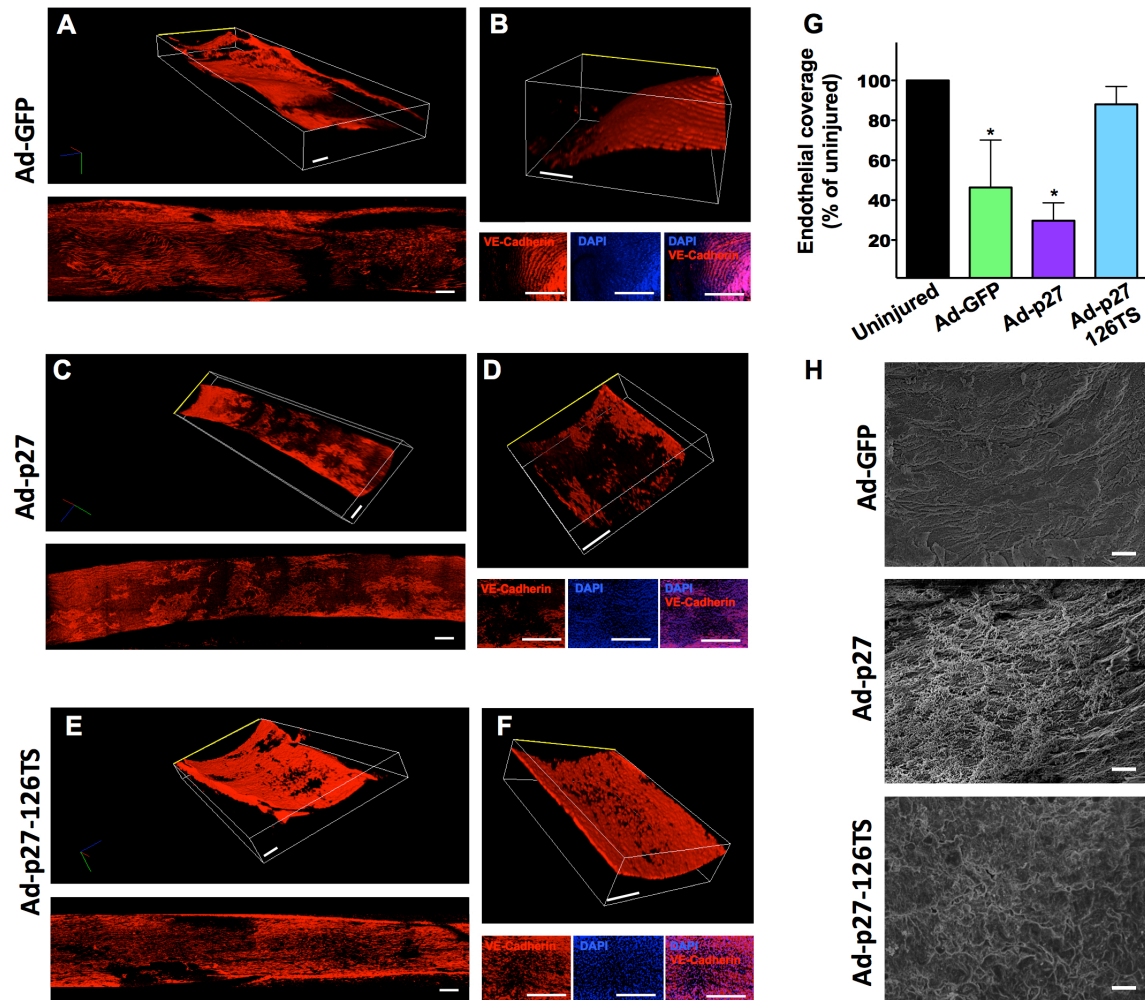

**Endothelial coverage assessed by confocal electron microscopy of *en face* longitudinal arterial preparations 4 weeks after injury.**

(A-F) Representative confocal images of the internal surface of the vessels immunostained for VE-Cadherin acquired at the. (A, C, E) Tridimensional (top) and bidimensional (bottom) imaging of the longitudinal *en face* preparation of the carotid arteries. (B, D, F) Tridimensional imaging of a representative central portion (see the methods and **Supplementary Fig. 7A** for detailed information about the imaging procedure) of the vessel (top), with the respective 2D

pictures showing the EC-specific immunostaining for VE-cadherin (bottom: VE-cadherin, DAPI and merge, as indicated), representing the endothelial coverage, which is quantified in panel **G**; the luminal side is indicated by the yellow line; see also the **Supplementary videos 9-14** for a tridimensional view. In all 2D and 3D pictures the dimensional bar is 400  $\mu\text{m}$ . All data shown are means  $\pm$  s.e.m. Data comparisons were made using one-way ANOVA with Tukey-Kramer *post hoc* test; n = at least 5/group; \* $P < 0.01$  versus uninjured. **(H)** Representative scanning electron microscopy (SEM) images of the internal surface of uninjured, Ad-GFP, Ad-p27 and Ad-p27-126TS infected arteries. In SEM pictures, the scale bar indicates 10  $\mu\text{m}$ .

Figure S7  
A

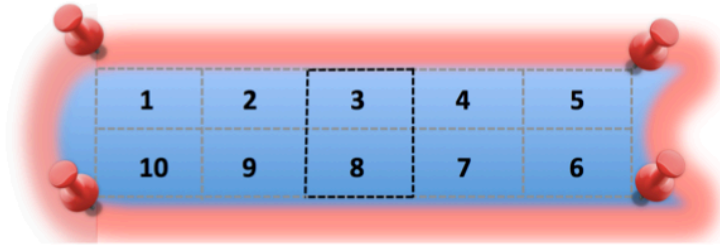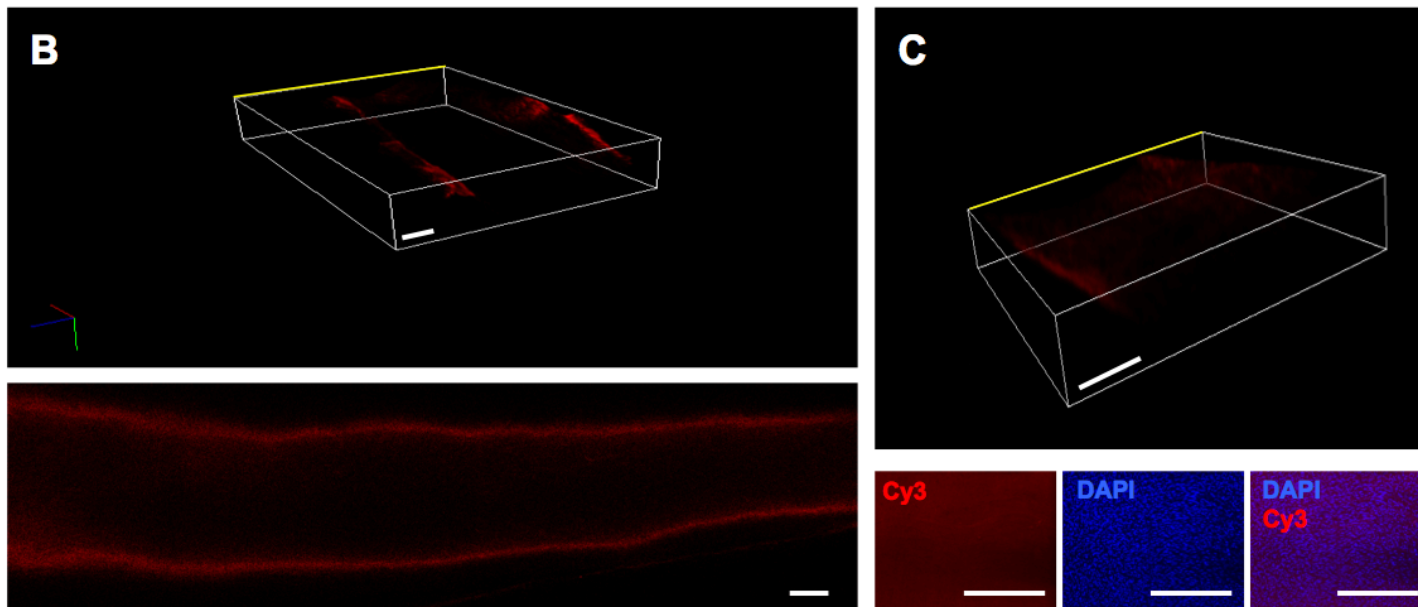

**Imaging and quantifications of the longitudinal *en face* arterial preparations.**

(A) Schematic representation of the examination of *en face* preparations at the confocal microscope. Ten adjacent quadrants of each carotid artery were independently scanned and subsequently 3D reconstructed using a dedicated software (Nikon NIS-Elements) to obtain the image of the whole vessel. The quantification of the endothelial coverage (VE-Cadherin staining) was performed quantifying the red areas of the central portion of the artery (represented by bold dashed lines, quadrants 3 and 8) by using ImageJ64. (B) No specific staining is shown (20 $\times$  magnification, confocal microscope) in the whole uninjured vessel stained with the Cy3 secondary antibody alone. Tridimensional (top) and bi-dimensional (bottom) imaging of the longitudinal *en face* preparation of the carotid artery is depicted. (C) Tridimensional



imaging (top) of a representative central portion of the vessel, with the respective 2D pictures (bottom) showing the immunostaining for Cy3, DAPI and merge, as indicated. See the **supplementary video 15 and 16** relative to the 3D images of the samples. Scale bar: 400  $\mu\text{m}$ .

Figure S8

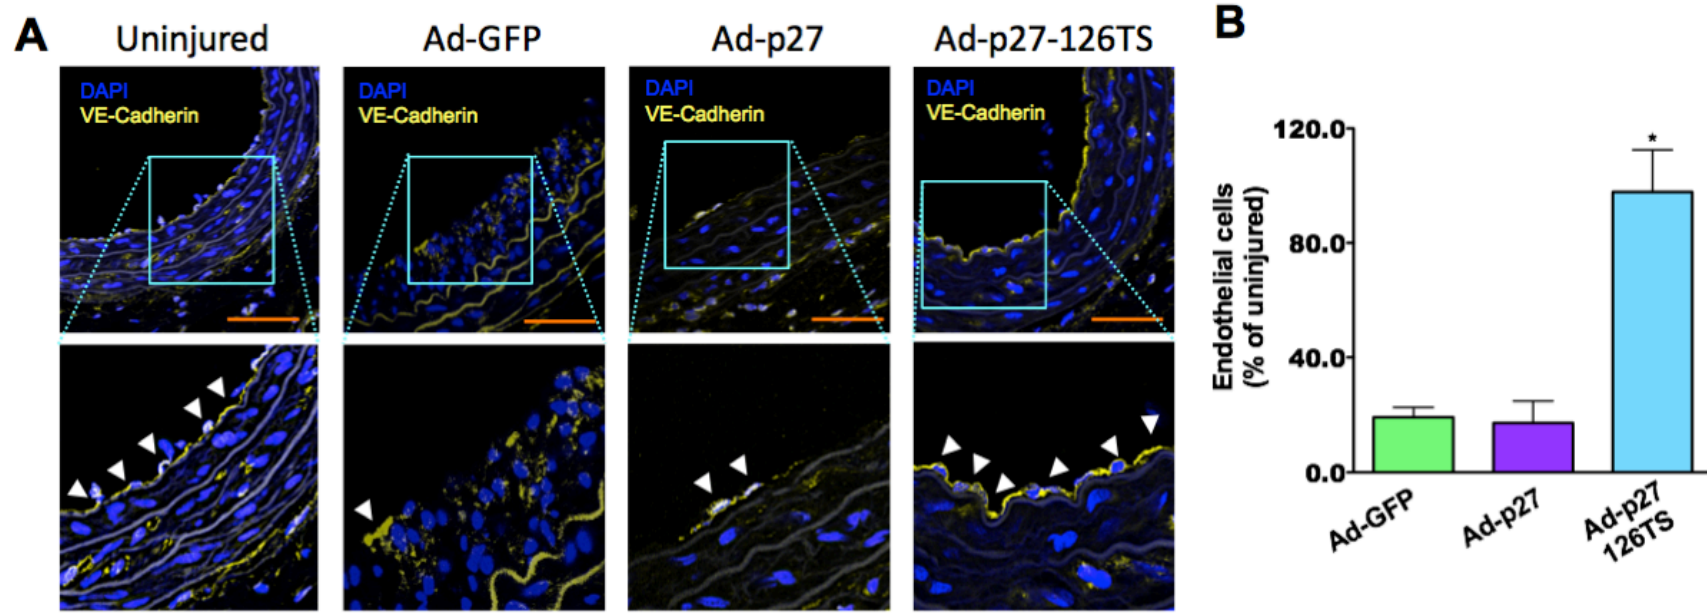

**Ad-p27-126TS restores re-endothelialization in cross sections of injured carotid arteries.**

(A) Representative sections of rat carotid arteries immunostained for the specific EC marker VE-Cadherin 4 weeks after injury. Nuclei were counterstained with DAPI. Orange scale bars: 100  $\mu$ m (magnification 60 $\times$ , inlays show high magnification images), arrowheads indicate EC beyond the inner autofluorescent elastic laminae. (B) Quantification of endothelial coverage was performed by counting the number of VE-cadherin positive cells in the circumference lumen from 6 sections/group. All data shown are means  $\pm$  SEM. Data comparison was performed using one-way ANOVA, Tukey-Kramer *post hoc* test.

Figure S9

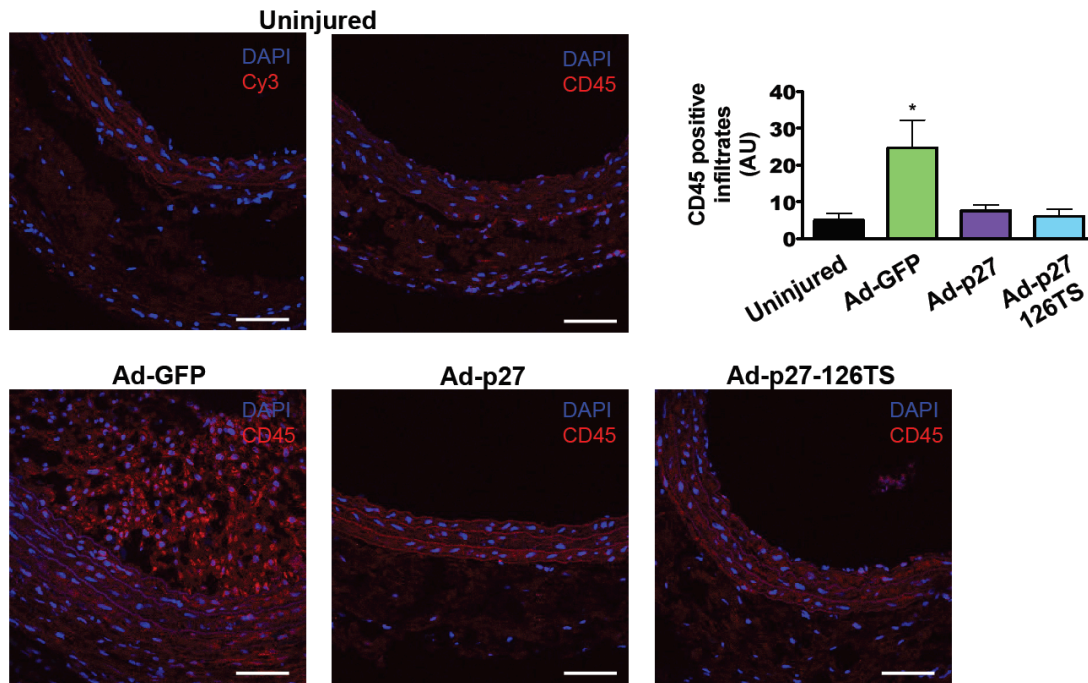

**Ad-p27 and Ad-p27-126TS inhibit arterial inflammation 2 weeks after balloon injury.**

Representative sections of rat carotid arteries immunostained for CD45, 2 weeks after injury. Nuclei were counterstained with DAPI. No positive staining was observed in the negative control sections (Cy3 alone). White scale bars: 100  $\mu$ m (magnification 40 $\times$ ). CD45 positive cells were quantified by counting the number of CD45 positive cells in the intimal and medial areas from at least 3 sections/group. Data comparison was made using one way ANOVA, Tukey-Kramer *post hoc* test; \* $P$  < 0.05 versus uninjured.

Figure S10

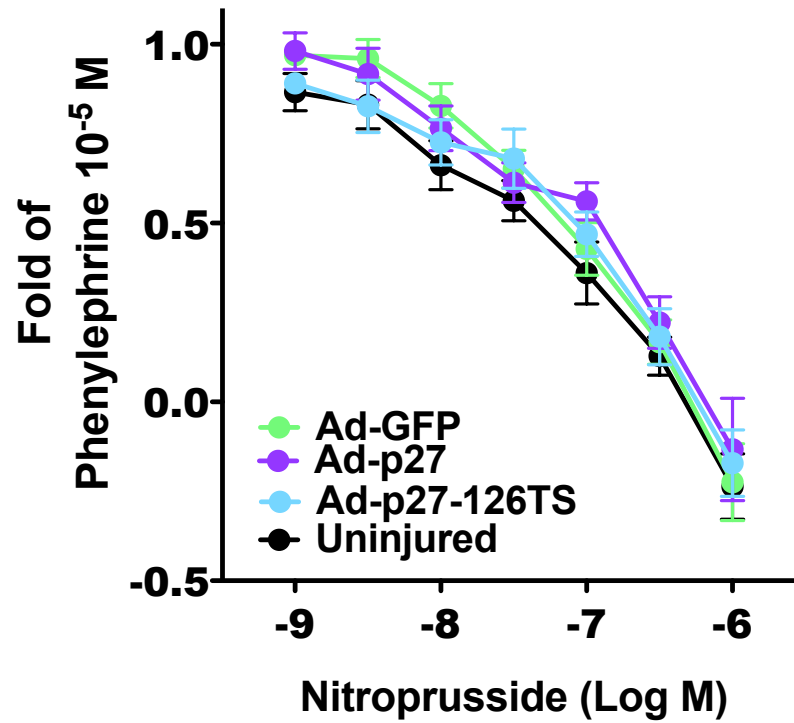**Vasodilatory response of carotid arteries to nitroprusside.**

Carotid rings 2 weeks after injury showing the vasodilative response to nitroprusside. n=5-6 rats/group. All the data are means  $\pm$  SEM.

## Video Legends

### Supplementary Video 1

#### **Uninjured vessel – entire artery.**

This video refers to Figure **4A**. Representative tridimensional reconstruction of a longitudinal *en face* preparation of an **uninjured** rat carotid artery immunostained with VE-cadherin (revealed by a Cy3 conjugated secondary antibody) and acquired at the confocal microscopy after assembling distinct portions of the vessel, each obtained from a high resolution focal stack of 2D images using sequential refocusing.

### Supplementary Video 2

#### **Uninjured vessel – central segment.**

This video refers to Figure **4B**. Representative tridimensional reconstruction of the central portion of a longitudinal *en face* preparation of an **uninjured** rat carotid artery. The EC-specific immunostaining for VE-cadherin of a central portion of the vessel is shown in red (Cy3), followed by DAPI staining and then the merge (Cy3/DAPI).

### Supplementary Video 3

#### **Ad-GFP infected rat carotid artery two weeks after injury – entire artery.**

This video refers to Figure **4C**. Representative tridimensional reconstruction of a longitudinal *en face* preparation of an **Ad-GFP** infected rat carotid artery **two weeks** after injury immunostained with VE-cadherin (revealed by a Cy3 conjugated secondary antibody) and acquired at the confocal microscopy after assembling distinct portions of the vessel, each obtained from a high resolution focal stack of 2D images using sequential refocusing.

### Supplementary Video 4

#### **Ad-GFP infected rat carotid artery two weeks after injury – central segment.**

This video refers to Figure **4D**. Representative tridimensional reconstruction of the central portion of a longitudinal *en face* of an **Ad-GFP** infected rat carotid artery **two weeks** after injury. The EC-specific immunostaining for VE-cadherin of a central portion of the vessel is shown in red (Cy3), followed by DAPI staining and then the merge (Cy3/DAPI).

### Supplementary Video 5

#### **Ad-p27 infected rat carotid artery two weeks after injury – entire artery.**

This video refers to Figure **4E**. Representative tridimensional reconstruction of a longitudinal *en face* preparation of an **Ad-p27** infected rat carotid artery **two weeks** after injury immunostained with VE-cadherin (revealed by a Cy3 conjugated secondary antibody) and acquired at the confocal microscopy after assembling distinct portions of the vessel, each obtained from a high resolution focal stack of 2D images using sequential refocusing.

### **Supplementary Video 6**

#### **Ad-p27 infected rat carotid artery two weeks after injury – central segment.**

This video refers to Figure **4F**. Representative tridimensional reconstruction of the central portion of a longitudinal *en face* preparation of an **Ad-p27** infected rat carotid artery **two weeks** after injury. The EC-specific immunostaining for VE-cadherin of a central portion of the vessel is shown in red (Cy3), followed by DAPI staining and then the merge (Cy3/DAPI).

### **Supplementary Video 7**

#### **Ad-p27-126TS infected rat carotid artery two weeks after injury – entire artery.**

This video refers to Figure **4 G**. Representative tridimensional reconstruction of a longitudinal *en face* preparation of an **Ad-p27-126TS** infected rat carotid artery **two weeks** after injury immunostained with VE-cadherin (revealed by a Cy3 conjugated secondary antibody) and acquired at the confocal microscopy after assembling distinct portions of the vessel [the acquisition of the central portion of the artery is shown in **H**] each obtained from a high resolution focal stack of 2D images using sequential refocusing.

### **Supplementary Video 8**

#### **Ad-p27-126TS infected rat carotid artery two weeks after injury – central segment.**

This video refers to Figure **4H**. Representative tridimensional reconstruction of the central portion of a longitudinal *en face* preparation of an **Ad-p27-126TS** infected rat carotid artery **two weeks** after injury. The EC-specific immunostaining for VE-cadherin of a central portion of the vessel is shown in red (Cy3), followed by DAPI staining and then the merge (Cy3/DAPI).

### **Supplementary Video 9**

#### **Ad-GFP infected rat carotid artery four weeks after injury – entire artery.**

This video refers to Figure **S6A**. Representative tridimensional reconstruction of a longitudinal *en face* preparation of an **Ad-GFP** infected rat carotid artery **four weeks** after injury immunostained with VE-cadherin (revealed by a Cy3 conjugated secondary antibody) and acquired at the confocal microscopy after assembling distinct portions of the vessel, each obtained from a high resolution focal stack of 2D images using sequential refocusing.

### **Supplementary Video 10**

#### **Ad-GFP infected rat carotid artery four weeks after injury – central segment.**

This video refers to Figure **S6B**. Representative tridimensional reconstruction of the central portion of a longitudinal *en face* preparation of an **Ad-GFP** infected rat carotid artery **four weeks** after injury. The EC-specific immunostaining for VE-cadherin of a central portion of the vessel is shown in red (Cy3), followed by DAPI staining and then the merge (Cy3/DAPI).

### **Supplementary Video 11**

#### **Ad-p27 infected rat carotid artery four weeks after injury – entire artery.**

This video refers to Figure **S6C**. Representative tridimensional reconstruction of a longitudinal *en face* preparation of an **Ad-p27** infected rat carotid artery **four weeks** after injury immunostained with VE-cadherin (revealed by a Cy3 conjugated secondary antibody) and acquired at the confocal microscopy after assembling distinct portions of the vessel, each obtained from a high resolution focal stack of 2D images using sequential refocusing.

### **Supplementary Video 12**

#### **Ad-p27 infected rat carotid artery four weeks after injury – central segment.**

This video refers to Figure **S6D**. Representative tridimensional reconstruction of the central portion of a longitudinal *en face* preparation of an **Ad-p27** infected rat carotid artery **four weeks** after injury. The EC-specific immunostaining for VE-cadherin of a central portion of the vessel is shown in red (Cy3), followed by DAPI staining and then the merge (Cy3/DAPI).

### **Supplementary Video 13**

#### **Ad-p27-126TS infected rat carotid artery four weeks after injury – entire artery.**

This video refers to Figure **S6E**. Representative tridimensional reconstruction of a longitudinal *en face* preparation of an **Ad-p27-126TS** infected rat carotid artery **four weeks** after injury immunostained with VE-cadherin (revealed by a Cy3 conjugated secondary antibody) and acquired at the confocal microscopy after assembling distinct portions of the vessel, each obtained from a high resolution focal stack of 2D images using sequential refocusing.

### **Supplementary Video 14**

#### **Ad-p27-126TS infected rat carotid artery four weeks after injury – central segment.**

This video refers to Figure **S6F**. Representative tridimensional reconstruction of the central portion of a longitudinal *en face* preparation of an **Ad-p27-126TS** infected rat carotid artery **four weeks** after injury. The EC-specific immunostaining for VE-cadherin of a central portion of the vessel is shown in red (Cy3), followed by DAPI staining and then the merge (Cy3/DAPI).

### **Supplementary Video 15**

#### **Negative control (secondary antibody alone) – entire artery.**

This video refers to Figure **S7B**. Representative tridimensional reconstruction of a longitudinal *en face* preparation of an uninjured rat carotid artery (stained with a Cy3 conjugated secondary antibody alone, as **negative control**) and acquired at the confocal microscopy after assembling distinct portions of the vessel [the acquisition of the central portion of the artery is shown in **C**] each obtained from a high resolution focal stack of 2D images using sequential refocusing.

**Supplementary Video 16**

**Negative control (secondary antibody alone) – central segment.**

This video refers to Figure **S7C**. Representative tridimensional reconstruction of the central portion of a longitudinal *en face* preparation of an uninjured rat carotid artery, stained with a Cy3 conjugated secondary antibody alone (as **negative control**). Cy3 staining, followed by DAPI and merge (Cy3/DAPI) are shown.
